# Supplementary material for: Process optimization of Syringa oblata Lindl. by response surface methodology and its effect on Staphylococcus xylosus biofilm
Source: Royal Society of Chemistry journal article supplement (doi:10.1039/c9ra06224f), 2019-01-01
Supplement: c9ra06224f1.pdf [file c9ra06224f1.pdf]

## Supplementary Material 1

**Fig. S1** Chromatograms of *Syringa oblata* Lindl samples on rutin (A) and different processing groups of normal (B), the stir-frying with vinegar (C), the stir-frying with salt-water (D), the stir-frying with ginger juice (E) and the stir-frying with honey (F).

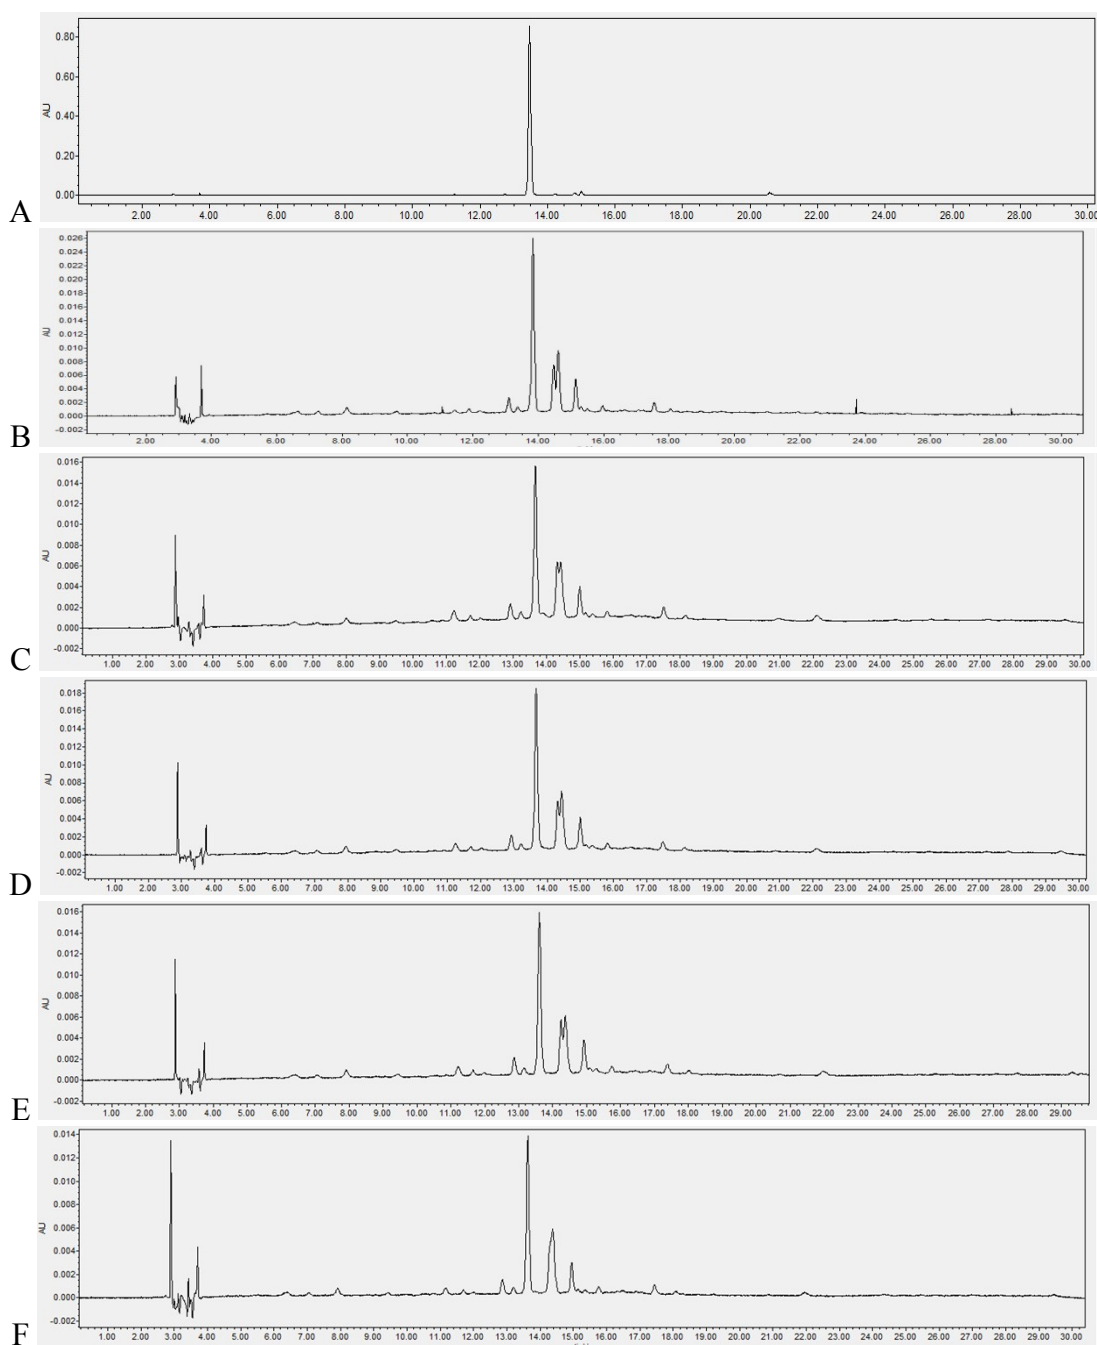

**Fig. S2** Response surface plots (three-dimensional) showing the effect of the moistening time ( $X_1$ , min), frying time ( $X_1$ , min) and the dosage of vinegar ( $X_3$ , mL) on the concentration of total flavonoids ( $Y_2$ , mg/g) in *Syringa oblata* Lindl.

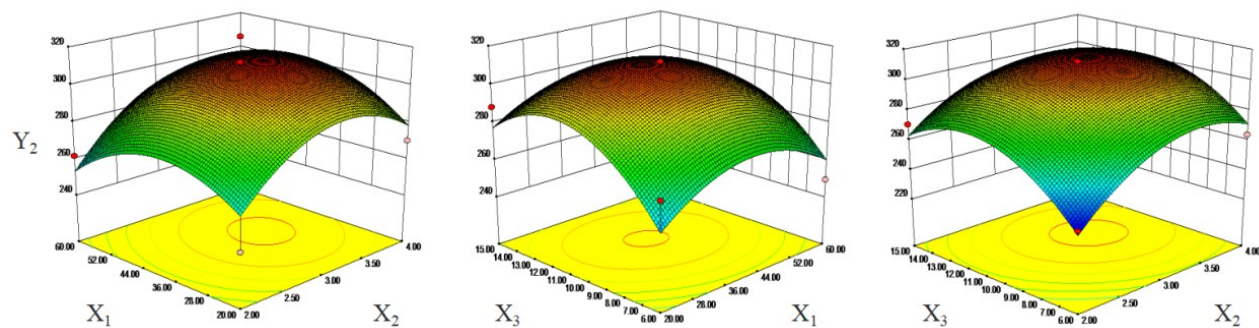

**Fig. S3** Chromatograms of *Syringa oblata* Lindl samples on histidine (A), control group without *Syringa oblata* Lindl (B), normal *Syringa oblata* Lindl (C) and the stir-frying with vinegar *Syringa oblata* Lindl (D).

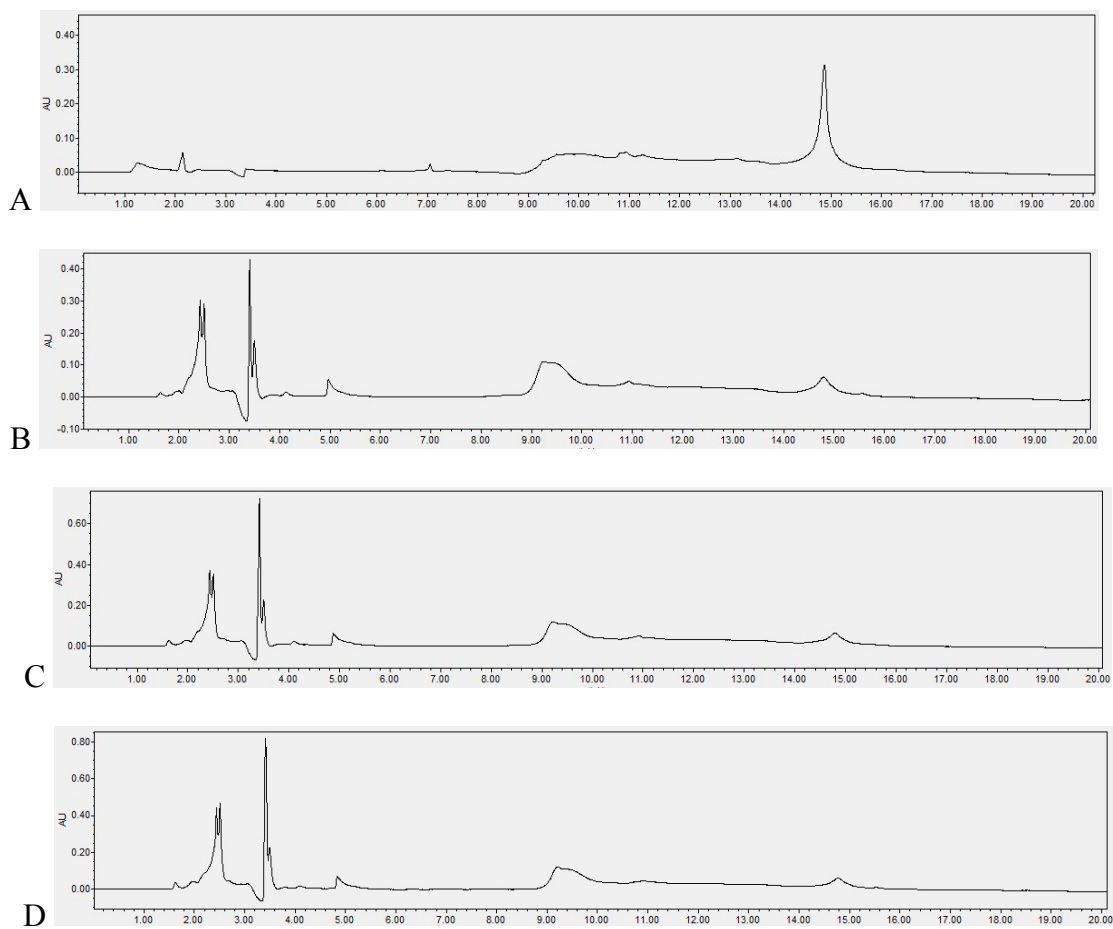

**Table S1.** The primers used for real-time PCR in the experiment.

| name      | Sequence (5' - 3' ) |
|-----------|---------------------|
| hisB-F    | TACTTCTGTATCACCATT  |
| hisB-R    | ACTATCTATCTCACTTGC  |
| 16S RNA-F | CGGGCAATTTGTTTAGCA  |
| 16S RNA-R | ATTAGGTGGAGCAGGTCA  |
